# Supplementary material for: Fermentation of the Brown Seaweed Alaria esculenta by a Lactic Acid Bacteria Consortium able to Utilize Mannitol and Laminari-Oligosaccharides
Source: Preprints.org preprint supplement (doi:10.20944/preprints202304.0235.v1), 2023-04-12
Supplement: Supplementary file 3 [file supplementary]

Type of the Paper (Article)

Fermentation of the Brown Seaweed *Alaria esculenta* by a Lactic Acid Bacteria Consortium able to Utilize Mannitol and Laminari-Oligosaccharides.

**Leila Allahgholi1*, Madeleine Jönsson1, Monica Daugbjerg Christensen2, Andrius Jasilionis1‚ Mehrnaz Nouri3, Shahram Lavasani3, Javier A. Linares-Pastén1‚ Guðmundur Óli Hreggviðsson2,4, Eva Nordberg Karlsson1**

1 Division of Biotechnology, Department of Chemistry, Lund University, Lund, Sweden; leila.allahgholi@biotek.lu.se; [madeleine.jonsson@biotek.lu.se](mailto:madeleine.jonsson@biotek.lu.se); [andrius.jasilionis@biotek.lu.se](mailto:andrius.jasilionis@biotek.lu.se); [javier.linares-pasten@biotek.lu.se](mailto:javier.linares-pasten@biotek.lu.se); eva.nordberg_karlsson@biotek.lu.se

2 Department of Biotechnology and biomolecules, Matís ohf, Reykjavík, Iceland; [monica@matis.is](mailto:monica@matis.is); [gudmundo@matis.is](mailto:gudmundo@matis.is)

**3** ImmuneBiotech AB, Lund, Sweden; [m.nouri@immunebiotech.com](mailto:m.nouri@immunebiotech.com); s.lavasani@immunebiotech.com

4 Faculty of Life and Environmental Sciences, University of Iceland, Reykjavík, Iceland

***** Correspondence: [leila.allahgholi@biotek.lu.se](mailto:leila.allahgholi@biotek.lu.se)

Supplementary document





**Figure** **S 1**: Agarose gel electrophoresis of 16S rRNA gene, amplified with universal primers fD1 and rP2 and purified from agarose gel. Thermo Scientific GeneRuler 1 kb DNA Ladder (Thermo Fisher Scientific) was used as DNA ladder.


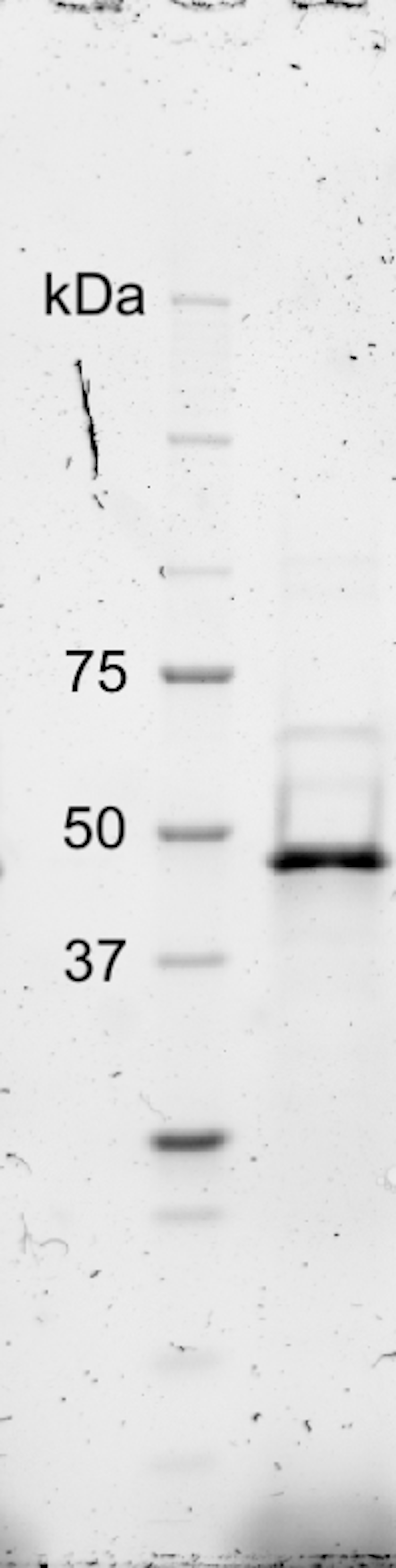


**Figure** **S 2**: *Ml*Lam17B purity and integrity determination with SDS-PAGE. Precision Plus Protein Dual Color Standards (Bio-Rad) molecular-mass marker was used to estimate the molecular weight of protein.

**Table S 1:** Composition analysis of *Alaria esculenta* after lyophilization

| Carbohydrate composition (% DW) | | | | |  |  |  |  |
| --- | --- | --- | --- | --- | --- | --- | --- | --- |
| Mannitol | Fucose | Galactose | Glucose | Xylose | Mannose | Mannuronic acids | Guluronic acids | Glucuronic acid |
| 6.02 ± 0.11 | 1.7 ± 0.01 | 1.0 ± 0.03 | 2.91 ± 0.1 | 0.3 ± 0.01 | 0.41 ± 0.01 | 7.98 ± 1.14 | 7.72 ± 1.38 | 0.86 ± 0.1 |
